# Supplementary material for: Porous cobalt(ii)-imidazolate supramolecular isomeric frameworks with selective gas sorption property
Source: Royal Society of Chemistry journal article supplement (doi:10.1039/c1cc10899a), 2011-01-01

## ***Electronic supplementary information (ESI)***

### **Porous cobalt(II)-imidazolate supramolecular isomeric frameworks with selective gas sorption property**

**Shui-Sheng Chen,<sup>a,c</sup> Min Chen,<sup>a</sup> Satoshi Takamizawa,<sup>b</sup> Peng Wang,<sup>a</sup> Gao-Chao Lv<sup>a</sup> and  
Wei-Yin Sun<sup>\*a</sup>**

<sup>a</sup> *Coordination Chemistry Institute, State Key Laboratory of Coordination Chemistry, School of Chemistry and Chemical Engineering, Nanjing National Laboratory of Microstructures, Nanjing University, Nanjing 210093, China.*

*E-mail: sunwy@nju.edu.cn; Fax: +86 25 83314502*

<sup>b</sup> *Graduate School of Nanobioscience, Yokohama City University, Kanazawa-ku, Yokohama, Kanagawa 236-0027, Japan*

<sup>c</sup> *School of Chemistry and Chemical Engineering, Fuyang Teachers College, Fuyang 236041, China*

**Materials and methods.** All commercially available chemicals are of reagent grade and were used as received without further purification. The ligand H<sub>3</sub>L was prepared according to the reported procedure.<sup>S1</sup> Elemental analyses of C, H and N were taken on a Perkin-Elmer 240C elemental analyzer at the analysis center of Nanjing University. Infrared spectra (IR) were recorded on a Bruker Vector22 FT-IR spectrophotometer by using KBr pellets. Thermogravimetric analyses (TGA) were performed on a simultaneous SDT 2960 thermal analyzer under nitrogen with a heating rate of 10 °C min<sup>-1</sup>. Powder X-ray diffraction (PXRD) patterns were measured on a Shimadzu XRD-6000 X-ray diffractometer with Cu K $\alpha$  ( $\lambda$  = 1.5418 Å) radiation at room temperature. Carbon dioxide (CO<sub>2</sub>) and nitrogen (N<sub>2</sub>) sorption experiments were carried out on a Belsorp-max volumetric gas sorption instrument

and methane (CH<sub>4</sub>) and hydrogen (H<sub>2</sub>) sorption experiments were performed on Quantachrome Autosorb-1MP.

**X-ray crystallography.** The crystallographic data collections for **1** and **2** were carried out on a Bruker Smart Apex CCD area-detector diffractometer with graphite-monochromated Mo K $\alpha$  radiation ( $\lambda = 0.71073$  Å) at 293(2) K using  $\omega$ -scan technique. The diffraction data were integrated by using the *SAINT* program,<sup>S2</sup> which was also used for the intensity corrections for the Lorentz and polarization effects. Semi-empirical absorption correction was applied using the *SADABS* program.<sup>S3</sup> The structures were solved by direct methods and all the non-hydrogen atoms were refined anisotropically on  $F^2$  by the full-matrix least-squares technique using the SHELXL-97 crystallographic software package.<sup>S4</sup>

**Reference:**

- S1 (a) M. P. Castaldi, S. E. Gibson, M. Rudd and A. J. P. White, *Chem. -Eur. J.* 2006, **12**, 138;  
(b) R. ten Have, M. Huisman, A. Meetsma and A. M. van Leusen, *Tetrahedron*, 1997, **53**, 11355.
- S2 *SAINT*, version 6.2; Bruker AXS, Inc., Madison, WI, 2001.
- S3 Sheldrick, G. M. *SADABS*, University of Göttingen, Göttingen, Germany.
- S4 Sheldrick, G. M. *SHELXTL*, version 6.10; Bruker Analytical X-ray Systems, Madison, WI, 2001.

**Table S1** Crystal data and structure refinements for complexes **1** and **2**

|                                                                  | <b>1</b>                                                         | <b>2</b>                                                         |
|------------------------------------------------------------------|------------------------------------------------------------------|------------------------------------------------------------------|
| Empirical formula                                                | C <sub>18</sub> H <sub>19</sub> N <sub>7</sub> O <sub>2</sub> Co | C <sub>15</sub> H <sub>14</sub> N <sub>6</sub> O <sub>2</sub> Co |
| Formula weight                                                   | 424.33                                                           | 369.25                                                           |
| Temperature / K                                                  | 293(2)                                                           | 293(2)                                                           |
| Crystal system                                                   | Monoclinic                                                       | Tetragonal                                                       |
| Space group                                                      | <i>P</i> 2 <sub>1</sub> /c                                       | <i>I</i> 4 <sub>1</sub> /a                                       |
| <i>a</i> / Å                                                     | 11.6486(14)                                                      | 23.3452(10)                                                      |
| <i>b</i> / Å                                                     | 17.609(2)                                                        | 23.3452(10)                                                      |
| <i>c</i> / Å                                                     | 10.5835(13)                                                      | 14.9359(13)                                                      |
| $\beta$ / °                                                      | 110.272(2)                                                       | 90.00                                                            |
| <i>V</i> (Å <sup>3</sup> )                                       | 2036.4(4)                                                        | 8140.0(9)                                                        |
| <i>Z</i>                                                         | 4                                                                | 16                                                               |
| D <sub>calc</sub> / (g cm <sup>-3</sup> )                        | 1.384                                                            | 1.205                                                            |
| <i>F</i> (000)                                                   | 876                                                              | 3024                                                             |
| $\theta$ range / °                                               | 1.86 - 25.01                                                     | 2.38 - 25.59                                                     |
| Reflections collected                                            | 9952                                                             | 20908                                                            |
| Independent reflections                                          | 3583                                                             | 3820                                                             |
| Goodness-of-fit on <i>F</i> <sup>2</sup>                         | 1.063                                                            | 1.113                                                            |
| <i>R</i> <sub>1</sub> [ <i>I</i> > 2σ( <i>I</i> )] <sup>a</sup>  | 0.0527                                                           | 0.0568                                                           |
| <i>wR</i> <sub>2</sub> [ <i>I</i> > 2σ( <i>I</i> )] <sup>b</sup> | 0.1529                                                           | 0.1614                                                           |

<sup>a</sup>  $R_1 = \sum ||F_o| - |F_c|| / \sum |F_o|$ . <sup>b</sup>  $wR_2 = [\sum w(|F_o|^2 - |F_c|^2)^2 / \sum w(F_o)^2]^{1/2}$ , where  $w = 1/[\sigma^2(F_o^2) + (aP)^2 + bP]$ .  $P = (F_o^2 + 2F_c^2)/3$ .

**Table S2** Selected bond lengths (Å) and bond angles (°) for complexes **1** and **2**

**1**

|                     |            |                     |            |
|---------------------|------------|---------------------|------------|
| Co(1)-N(1)          | 2.016(3)   | Co(1)-N(5)#1        | 1.988(3)   |
| Co(1)-N(6)#2        | 1.993(3)   | Co(1)-N(3)#3        | 2.002(3)   |
| N(5)#1-Co(1)-N(6)#2 | 113.15(12) | N(5)#1-Co(1)-N(3)#3 | 111.93(12) |
| N(6)#2-Co(1)-N(3)#3 | 112.54(12) | N(5)#1-Co(1)-N(1)   | 108.30(12) |
| N(6)#2-Co(1)-N(1)   | 106.91(12) | N(3)#3-Co(1)-N(1)   | 103.32(11) |

**2**

|                     |            |                     |            |
|---------------------|------------|---------------------|------------|
| Co(1)-N(1)#4        | 1.976(3)   | Co(1)-N(3)#5        | 1.979(3)   |
| Co(1)-N(2)          | 1.988(3)   | Co(1)-N(5)#6        | 2.010(3)   |
| N(1)#4-Co(1)-N(3)#5 | 109.49(12) | N(1)#4-Co(1)-N(2)   | 115.50(13) |
| N(3)#5-Co(1)-N(2)   | 113.30(14) | N(1)#4-Co(1)-N(5)#6 | 107.91(13) |
| N(3)#5-Co(1)-N(5)#6 | 110.78(13) | N(2)-Co(1)-N(5)#6   | 99.30(13)  |

Symmetry transformations used to generate equivalent atoms: #1  $x+1, y, z$ , #2  $x+1, -y+1/2, z+1/2$ , #3  $-x+1, y-1/2, -z+3/2$ , #4  $-y+3/4, x+1/4, z+1/4$ , #5  $-x+1/2, -y+3/2, -z+1/2$ , #6  $-x+1/2, -y+1, z-1/2$ .

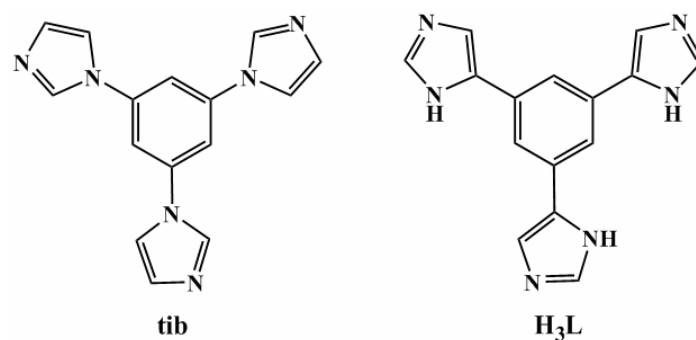

**Scheme S1.** Schematic structures of tib and H<sub>3</sub>L.

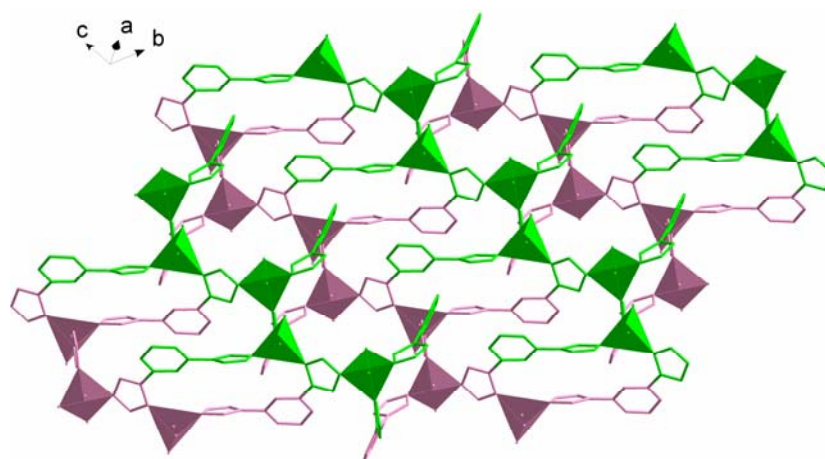

**Figure S1.** 2D network of **1** formed by two of three imidazole groups of (HL)<sup>2-</sup> coordinating with Co(II) atoms.

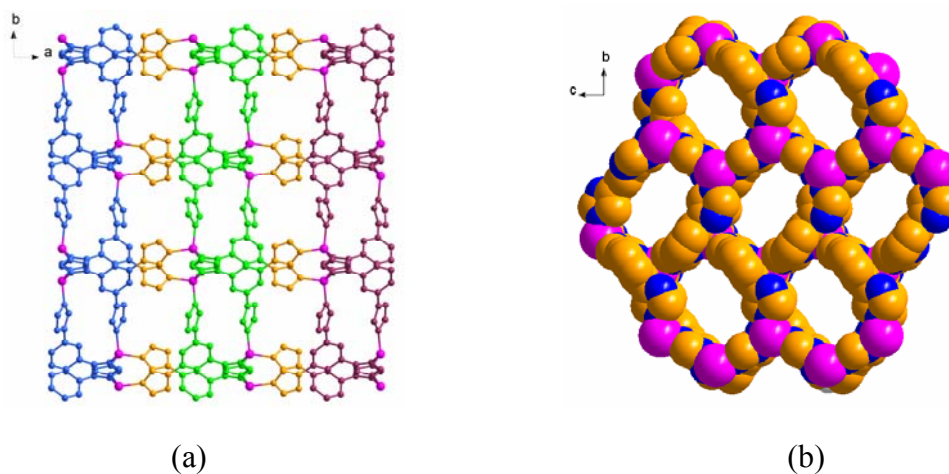

**Figure S2.** (a) 3D structure of **1** constructed from the 2D networks (in color) pillared by the third imidazole group (yellow). (b) The space filling view of the 1D channels along *a* axis in **1**.

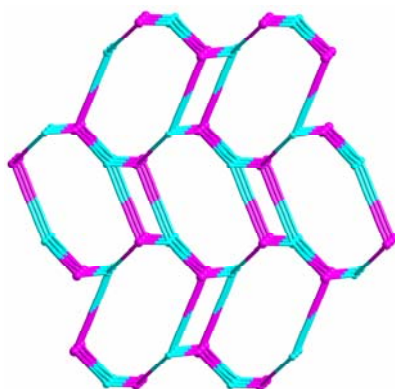

**Figure S3.** Schematic representation of the zeolite **BCT** topology of **1**, pink balls represent the Co(II) atoms and turquoise balls represent the centers of benzene ring plane of  $(\text{HL})^{2-}$ .

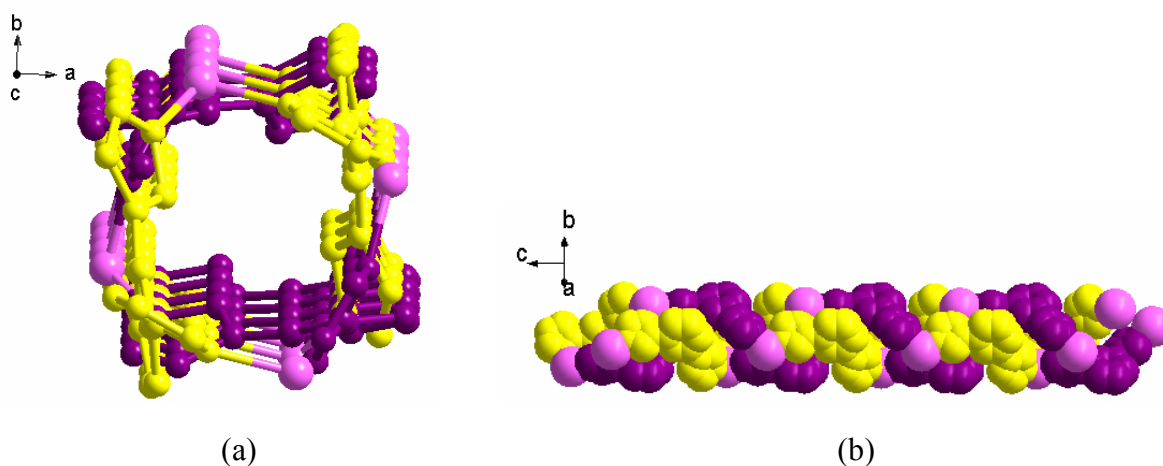

**Figure S4.** (a) The helical tubes in **2** represented by central phenyl rings and imidazole groups together with Co(II) atoms. (b) The  $4_1$  helixes in **2**.

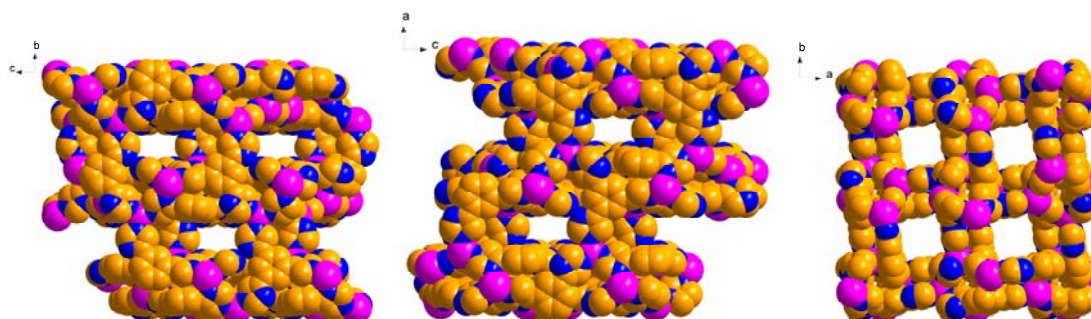

**Figure S5.** The space filling views of 3D channels of **2** along  $a$ ,  $b$ ,  $c$  axes respectively.

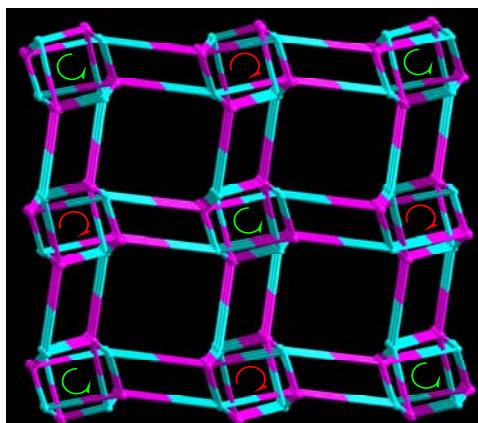

**Figure S6.** Schematic representation of the **ecl/I** topology of **2**, pink balls represent the Co(II) atoms and turquoise balls represent the centers of benzene ring plane of (HL)<sup>2-</sup>.

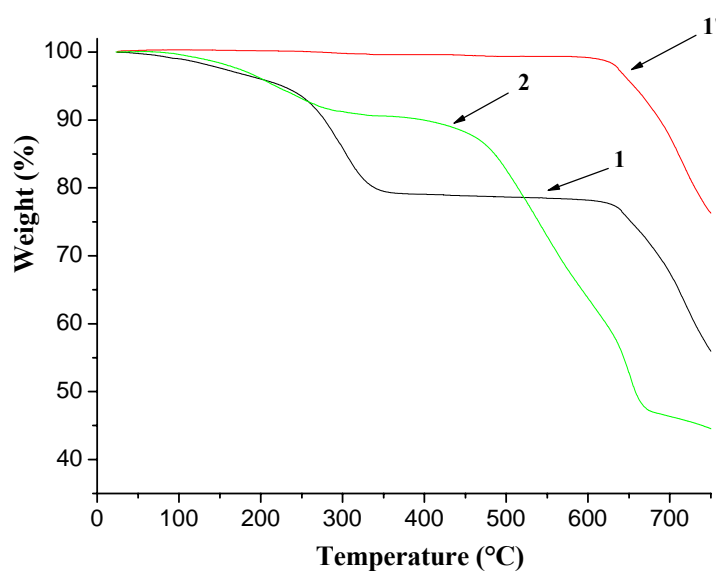

**Figure S7.** The TGA curves of **1**, **1'** and **2**.

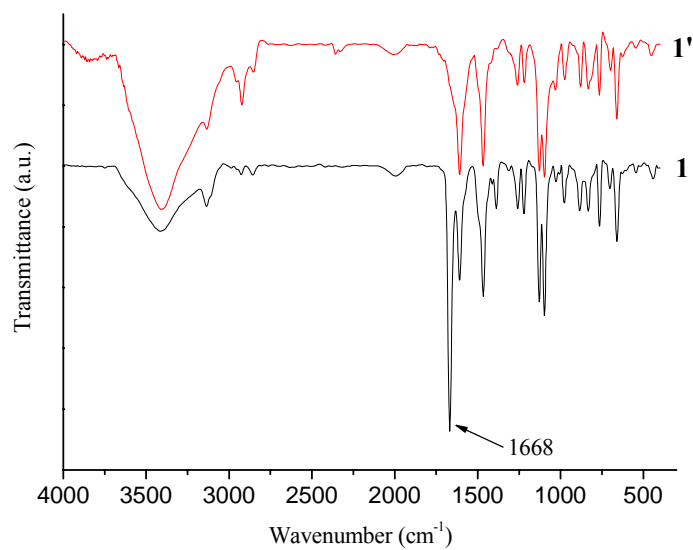

**Figure S8.** IR spectra of **1** and **1'**.

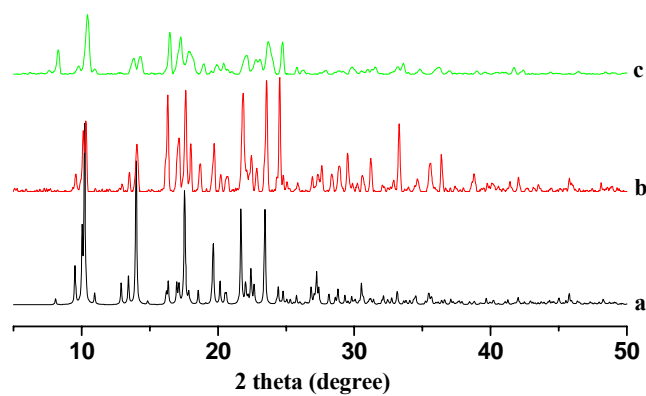

**Figure S9.** The PXRD patterns of **1**: a - simulated; b - as-synthesized; c - desolvated solid **1'** obtained by heating **1** at 210 °C under vacuum for 24 h.

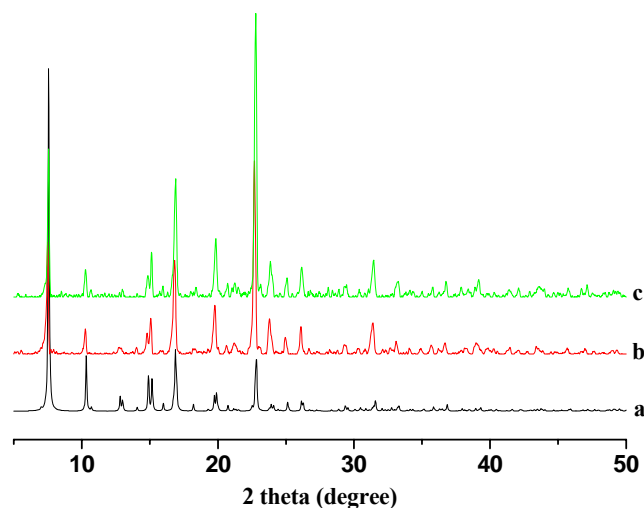

**Figure S10.** The PXRD patterns of **2**: a - simulated; b - as-synthesized; c - desolvated solid **2'** obtained by heating **2** at 160 °C under vacuum for 24 h.

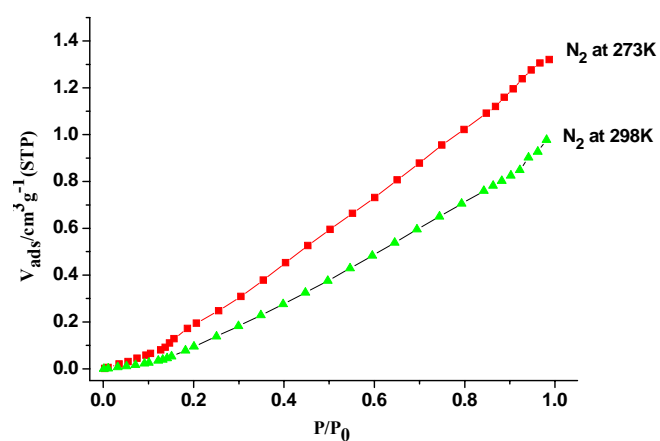

**Figure S11.** N<sub>2</sub> gas adsorption isotherms of **1'**: (▲) at 298 K, (■) at 273 K. Filled shape: adsorption; open shape: desorption.

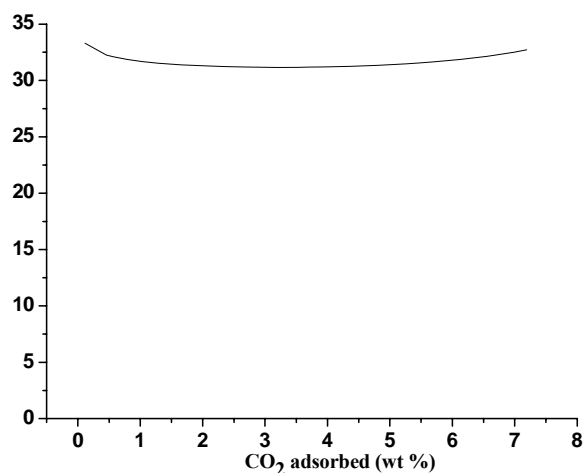

**Figure S12.** CO<sub>2</sub> adsorption enthalpy for **2'** calculated from the CO<sub>2</sub> adsorption isotherms at 273 and 298 K.

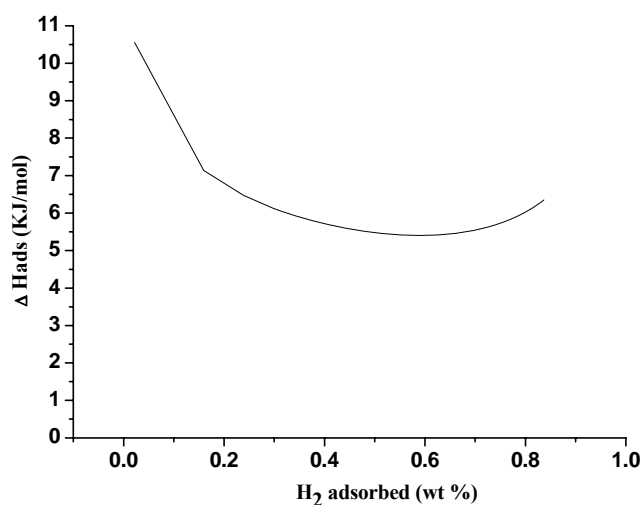

**Figure S13.** H<sub>2</sub> adsorption enthalpy for **2'** calculated from the H<sub>2</sub> adsorption isotherms at 77 and 87 K.

#### Analysis of Gas Sorption Isotherms:

The methods are applied to deal with the sorption data according to the literature 15 (*J. Am. Chem. Soc.* 2005, **127**, 9367). The Langmuir-Freundlich equation is used to fit CO<sub>2</sub> and H<sub>2</sub> adsorption isotherms and predict the adsorption capacity of the framework at saturation, and Clausius-Clapeyron equation is employed to calculation the enthalpies of CO<sub>2</sub> and H<sub>2</sub>

adsorption.

$$\ln\left(\frac{P_1}{P_2}\right) = \Delta H_{ads} \times \frac{T_2 - T_1}{RT_1T_2} \quad (\text{I})$$

Where  $P_i$  = pressure for isotherm  $i$

$T_i$  = temperature for isotherm  $i$

$R = 8.315 \text{ J / (K}\cdot\text{mol)}$

The equation (I) can be applied to calculate the enthalpy of adsorption of a gas as a function of the quantity of gas adsorbed. Pressure as a function of the amount of gas adsorbed was determined using the Langmuir-Freundlich fit for the isotherms.

$$\frac{Q}{Q_m} = \frac{BP^{(1/t)}}{1 + BP^{(1/t)}} \quad (\text{II})$$

where  $Q$  = moles adsorbed

$Q_m$  = moles adsorbed at saturation

$P$  = pressure

$B$  and  $t$  are constants

Rearrange (II) to get:

$$P = \left( \frac{Q/Q_m}{B - BQ/Q_m} \right)^t \quad (\text{III})$$

Replace  $P$  in equation (I) to obtain:

$$\Delta H_{ads} = \frac{RT_1T_2}{T_2 - T_1} \times \ln \frac{\left( \frac{Q/Q_{m1}}{B_1 - B_1Q/Q_{m1}} \right)^t}{\left( \frac{Q/Q_{m2}}{B_2 - B_2Q/Q_{m2}} \right)^t} \quad (\text{IV})$$

## 1. Dealing with the carbon dioxide adsorption data in details for 2':

(1) Fitting  $\text{CO}_2$  adsorption isotherms using the Langmuir-Freundlich equation.

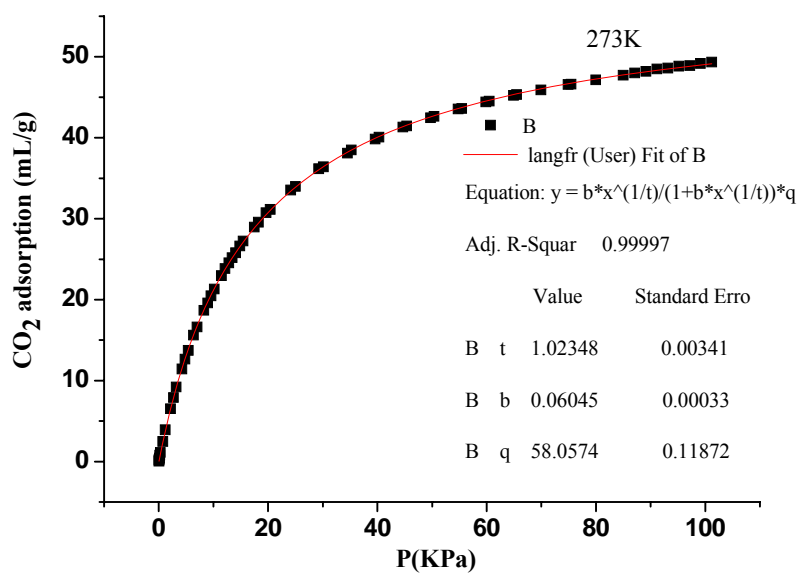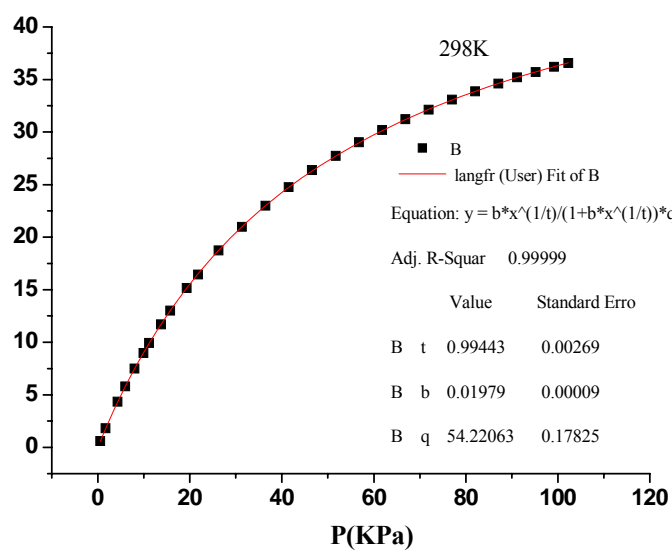

(2) Building the relationship between  $\ln P$  and the quantity of CO<sub>2</sub> adsorbed for the two isotherms by calculating.

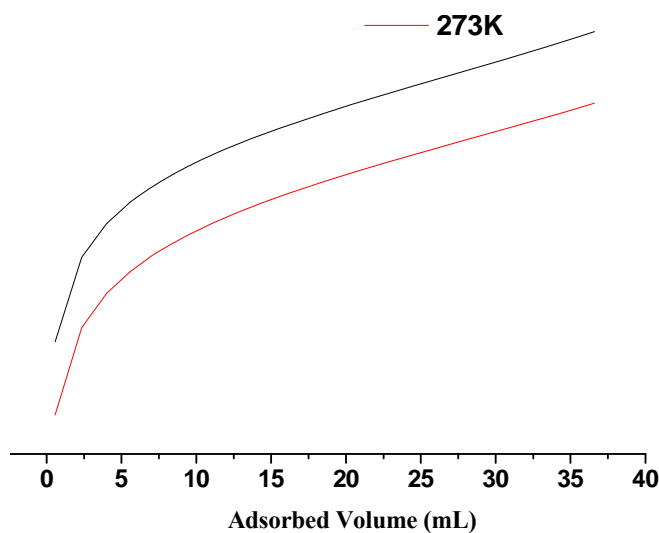

(3) Calculating the  $\Delta H_{\text{ads}}$  using the equation IV.

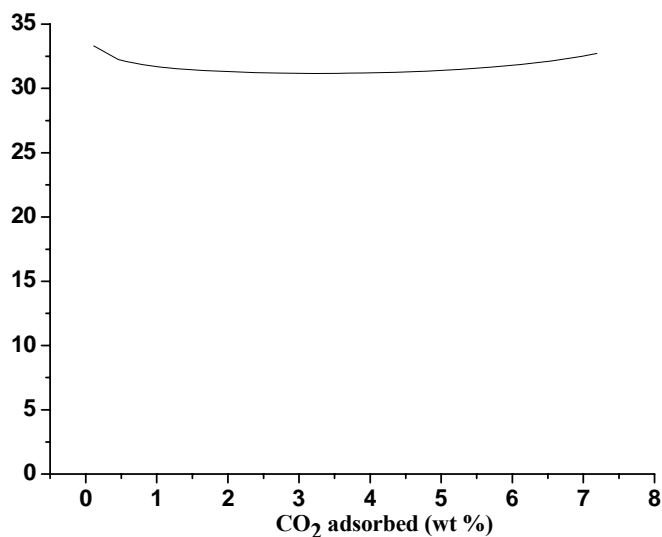

## 2. Calculation of CO<sub>2</sub>/N<sub>2</sub> selectivity

The methods are applied to estimate the CO<sub>2</sub>/N<sub>2</sub> selectivity according to the literature 17a (*J. Am. Chem. Soc.*, 2010, **132**, 38). The ratios of these initial slopes of the CO<sub>2</sub> and N<sub>2</sub> adsorption isotherms were applied to estimate the adsorption selectivity for CO<sub>2</sub> over N<sub>2</sub>.

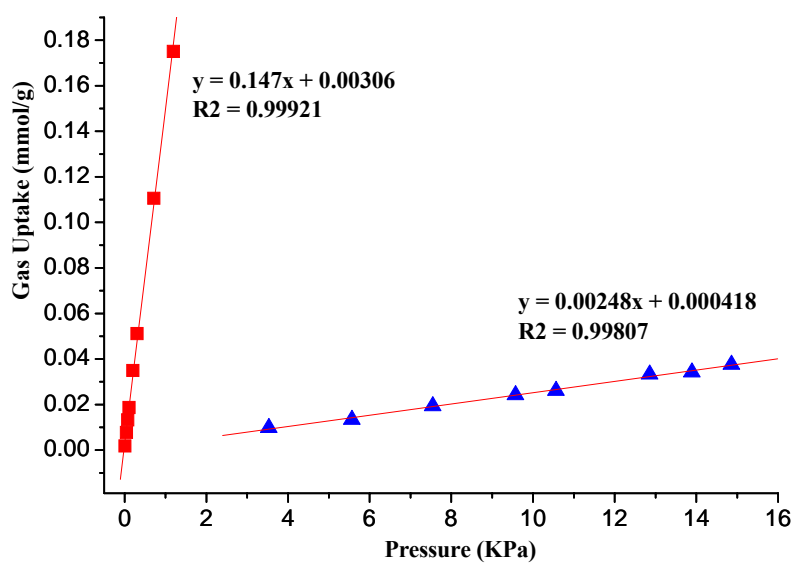

**Figure S14.** The fitting initial slope for CO<sub>2</sub> and N<sub>2</sub> isotherms collected at 273 K (CO<sub>2</sub>: red squares; N<sub>2</sub>: blue triangles).

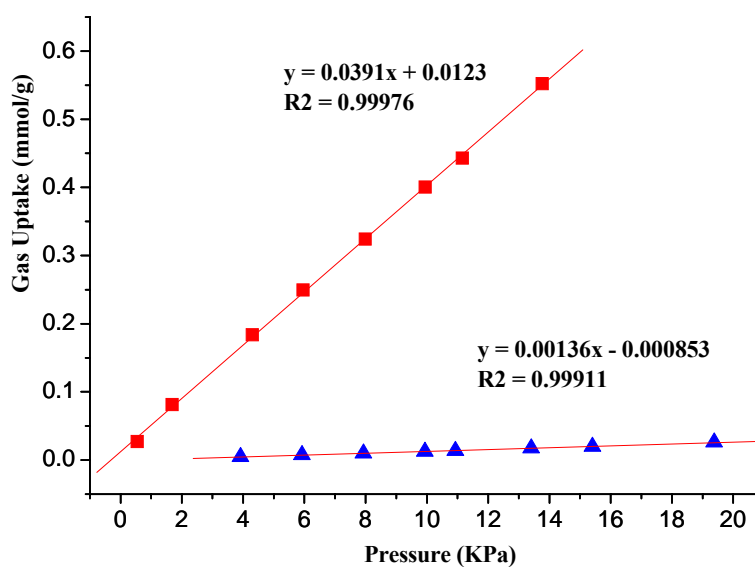

**Figure S15.** The fitting initial slope for CO<sub>2</sub> and N<sub>2</sub> isotherms collected at 298 K (CO<sub>2</sub>: red squares; N<sub>2</sub>: blue triangles).

### 3. Dealing with the hydrogen adsorption data in details:

(1) Fitting H<sub>2</sub> adsorption isotherms using the Langmuir-Freundlich equation.

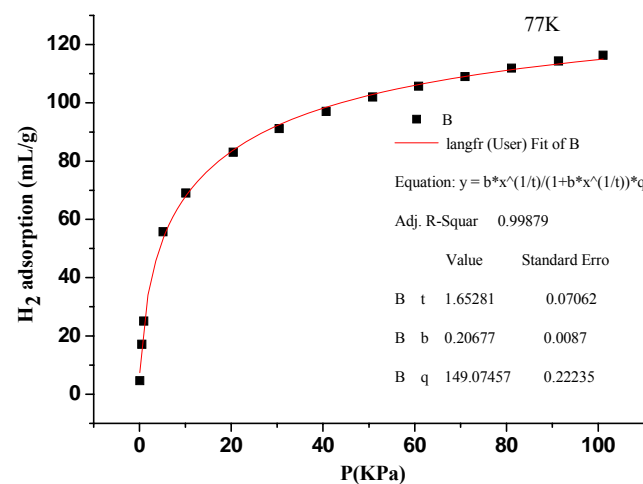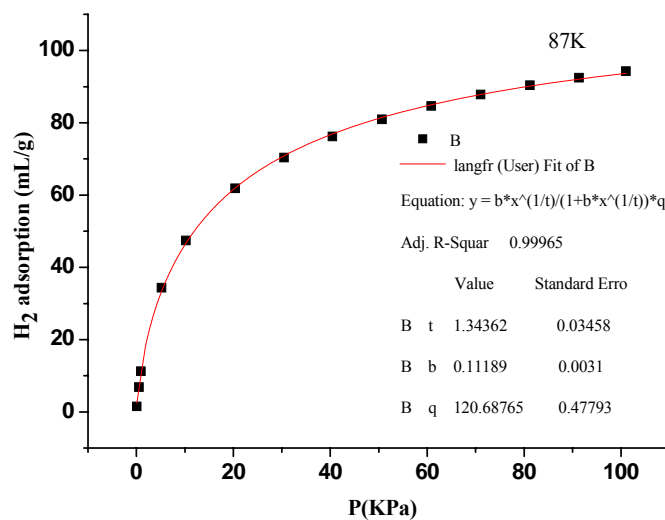

(2) Building the relationship between  $\ln P$  and the quantity of hydrogen adsorbed for the two isotherms by calculating.

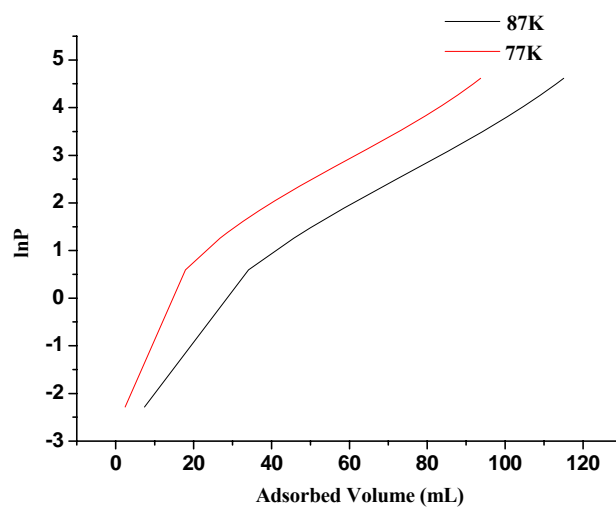

(3) Calculating the  $\Delta H_{\text{ads}}$  using the equation **IV**.

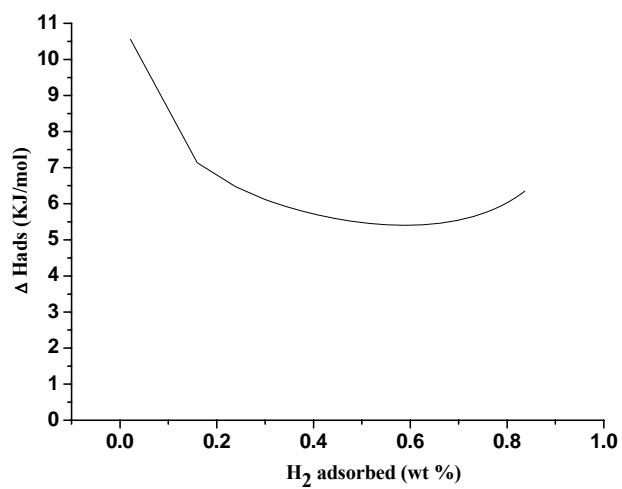

Supplement: c1cc10899a.pdf [file c1cc10899a.pdf]
