# Supplementary material for: Porous cobalt(ii)-imidazolate supramolecular isomeric frameworks with selective gas sorption property
Source: Royal Society of Chemistry journal article supplement (doi:10.1039/c1cc10899a), 2011-01-01
Supplement: c1cc10899a.pdf [file c1cc10899a.pdf]

## *Electronic supplementary information (ESI)*

### **Porous cobalt(II)-imidazolate supramolecular isomeric frameworks with selective gas sorption property**

**Shui-Sheng Chen,<sup>a,c</sup> Min Chen,<sup>a</sup> Satoshi Takamizawa,<sup>b</sup> Peng Wang,<sup>a</sup> Gao-Chao Lv<sup>a</sup> and Wei-Yin Sun<sup>\*a</sup>**

<sup>a</sup> *Coordination Chemistry Institute, State Key Laboratory of Coordination Chemistry, School of Chemistry and Chemical Engineering, Nanjing National Laboratory of Microstructures, Nanjing University, Nanjing 210093, China.*

*E-mail: sunwy@nju.edu.cn; Fax: +86 25 83314502*

<sup>b</sup> *Graduate School of Nanobioscience, Yokohama City University, Kanazawa-ku, Yokohama, Kanagawa 236-0027, Japan*

<sup>c</sup> *School of Chemistry and Chemical Engineering, Fuyang Teachers College, Fuyang 236041, China*

**Materials and methods.** All commercially available chemicals are of reagent grade and were used as received without further purification. The ligand H<sub>3</sub>L was prepared according to the reported procedure.<sup>S1</sup> Elemental analyses of C, H and N were taken on a Perkin-Elmer 240C elemental analyzer at the analysis center of Nanjing University. Infrared spectra (IR) were recorded on a Bruker Vector22 FT-IR spectrophotometer by using KBr pellets. Thermogravimetric analyses (TGA) were performed on a simultaneous SDT 2960 thermal analyzer under nitrogen with a heating rate of 10 °C min<sup>-1</sup>. Powder X-ray diffraction (PXRD) patterns were measured on a Shimadzu XRD-6000 X-ray diffractometer with Cu K $\alpha$  ( $\lambda = 1.5418 \text{ \AA}$ ) radiation at room temperature. Carbon dioxide (CO<sub>2</sub>) and nitrogen (N<sub>2</sub>) sorption experiments were carried out on a Belsorp-max volumetric gas sorption instrument

and methane (CH<sub>4</sub>) and hydrogen (H<sub>2</sub>) sorption experiments were performed on Quantachrome Autosorb-1MP.

**X-ray crystallography.** The crystallographic data collections for **1** and **2** were carried out on a Bruker Smart Apex CCD area-detector diffractometer with graphite-monochromated Mo K $\alpha$  radiation ( $\lambda = 0.71073 \text{ \AA}$ ) at 293(2) K using  $\omega$ -scan technique. The diffraction data were integrated by using the *SAINTE* program,<sup>S2</sup> which was also used for the intensity corrections for the Lorentz and polarization effects. Semi-empirical absorption correction was applied using the *SADABS* program.<sup>S3</sup> The structures were solved by direct methods and all the non-hydrogen atoms were refined anisotropically on  $F^2$  by the full-matrix least-squares technique using the SHELXL-97 crystallographic software package.<sup>S4</sup>

**Reference:**

- S1 (a) M. P. Castaldi, S. E. Gibson, M. Rudd and A. J. P. White, *Chem. -Eur. J.* 2006, **12**, 138;  
(b) R. ten Have, M. Huisman, A. Meetsma and A. M. van Leusen, *Tetrahedron*, 1997, **53**, 11355.
- S2 *SAINTE*, version 6.2; Bruker AXS, Inc., Madison, WI, 2001.
- S3 Sheldrick, G. M. *SADABS*, University of Göttingen, Göttingen, Germany.
- S4 Sheldrick, G. M. *SHELXTL*, version 6.10; Bruker Analytical X-ray Systems, Madison, WI, 2001.

**Table S1** Crystal data and structure refinements for complexes **1** and **2**

|                                                                  | <b>1</b>                                                         | <b>2</b>                                                         |
|------------------------------------------------------------------|------------------------------------------------------------------|------------------------------------------------------------------|
| Empirical formula                                                | C <sub>18</sub> H <sub>19</sub> N <sub>7</sub> O <sub>2</sub> Co | C <sub>15</sub> H <sub>14</sub> N <sub>6</sub> O <sub>2</sub> Co |
| Formula weight                                                   | 424.33                                                           | 369.25                                                           |
| Temperature / K                                                  | 293(2)                                                           | 293(2)                                                           |
| Crystal system                                                   | Monoclinic                                                       | Tetragonal                                                       |
| Space group                                                      | <i>P</i> 2 <sub>1</sub> / <i>c</i>                               | <i>I</i> 4 <sub>1</sub> / <i>a</i>                               |
| <i>a</i> / Å                                                     | 11.6486(14)                                                      | 23.3452(10)                                                      |
| <i>b</i> / Å                                                     | 17.609(2)                                                        | 23.3452(10)                                                      |
| <i>c</i> / Å                                                     | 10.5835(13)                                                      | 14.9359(13)                                                      |
| $\beta$ / °                                                      | 110.272(2)                                                       | 90.00                                                            |
| <i>V</i> (Å <sup>3</sup> )                                       | 2036.4(4)                                                        | 8140.0(9)                                                        |
| <i>Z</i>                                                         | 4                                                                | 16                                                               |
| D <sub>calc</sub> / (g cm <sup>-3</sup> )                        | 1.384                                                            | 1.205                                                            |
| <i>F</i> (000)                                                   | 876                                                              | 3024                                                             |
| $\theta$ range / °                                               | 1.86 - 25.01                                                     | 2.38 - 25.59                                                     |
| Reflections collected                                            | 9952                                                             | 20908                                                            |
| Independent reflections                                          | 3583                                                             | 3820                                                             |
| Goodness-of-fit on <i>F</i> <sup>2</sup>                         | 1.063                                                            | 1.113                                                            |
| <i>R</i> <sub>1</sub> [ <i>I</i> > 2σ( <i>I</i> )] <sup>a</sup>  | 0.0527                                                           | 0.0568                                                           |
| <i>wR</i> <sub>2</sub> [ <i>I</i> > 2σ( <i>I</i> )] <sup>b</sup> | 0.1529                                                           | 0.1614                                                           |

<sup>a</sup>  $R_1 = \frac{\sum ||F_o| - |F_c||}{\sum |F_o|}$ . <sup>b</sup>  $wR_2 = \frac{|\sum w(|F_o|^2 - |F_c|^2)|}{\sum w(F_o^2)^{1/2}}$ , where  $w = 1/[\sigma^2(F_o^2) + (aP)^2 + bP]$ .  $P = (F_o^2 + 2F_c^2)/3$ .

**Table S2** Selected bond lengths (Å) and bond angles (°) for complexes **1** and **2**

**1**

|                     |            |                     |            |
|---------------------|------------|---------------------|------------|
| Co(1)-N(1)          | 2.016(3)   | Co(1)-N(5)#1        | 1.988(3)   |
| Co(1)-N(6)#2        | 1.993(3)   | Co(1)-N(3)#3        | 2.002(3)   |
| N(5)#1-Co(1)-N(6)#2 | 113.15(12) | N(5)#1-Co(1)-N(3)#3 | 111.93(12) |
| N(6)#2-Co(1)-N(3)#3 | 112.54(12) | N(5)#1-Co(1)-N(1)   | 108.30(12) |
| N(6)#2-Co(1)-N(1)   | 106.91(12) | N(3)#3-Co(1)-N(1)   | 103.32(11) |

**2**

|                     |            |                     |            |
|---------------------|------------|---------------------|------------|
| Co(1)-N(1)#4        | 1.976(3)   | Co(1)-N(3)#5        | 1.979(3)   |
| Co(1)-N(2)          | 1.988(3)   | Co(1)-N(5)#6        | 2.010(3)   |
| N(1)#4-Co(1)-N(3)#5 | 109.49(12) | N(1)#4-Co(1)-N(2)   | 115.50(13) |
| N(3)#5-Co(1)-N(2)   | 113.30(14) | N(1)#4-Co(1)-N(5)#6 | 107.91(13) |
| N(3)#5-Co(1)-N(5)#6 | 110.78(13) | N(2)-Co(1)-N(5)#6   | 99.30(13)  |

Symmetry transformations used to generate equivalent atoms: #1  $x+1, y, z$ , #2  $x+1, -y+1/2, z+1/2$ , #3  $-x+1, y-1/2, -z+3/2$ , #4  $-y+3/4, x+1/4, z+1/4$ , #5  $-x+1/2, -y+3/2, -z+1/2$ , #6  $-x+1/2, -y+1, z-1/2$ .

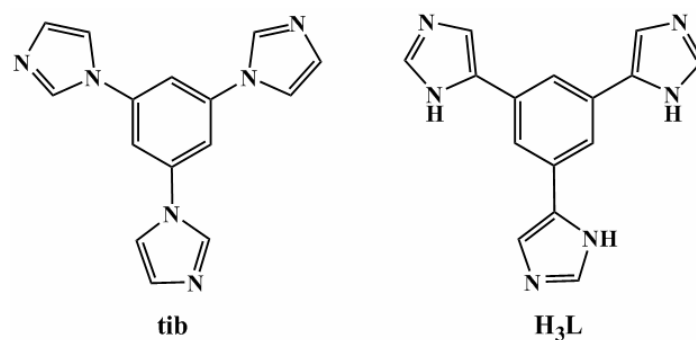

**Scheme S1.** Schematic structures of tib and H<sub>3</sub>L.

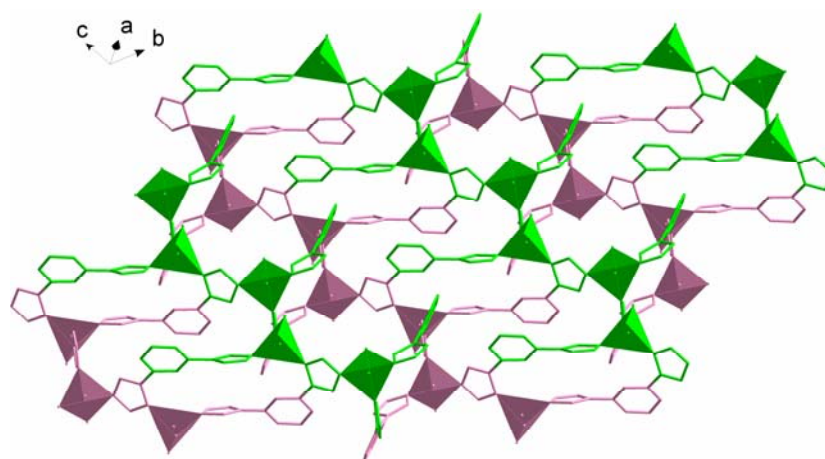

**Figure S1.** 2D network of **1** formed by two of three imidazole groups of (HL)<sup>2-</sup> coordinating with Co(II) atoms.

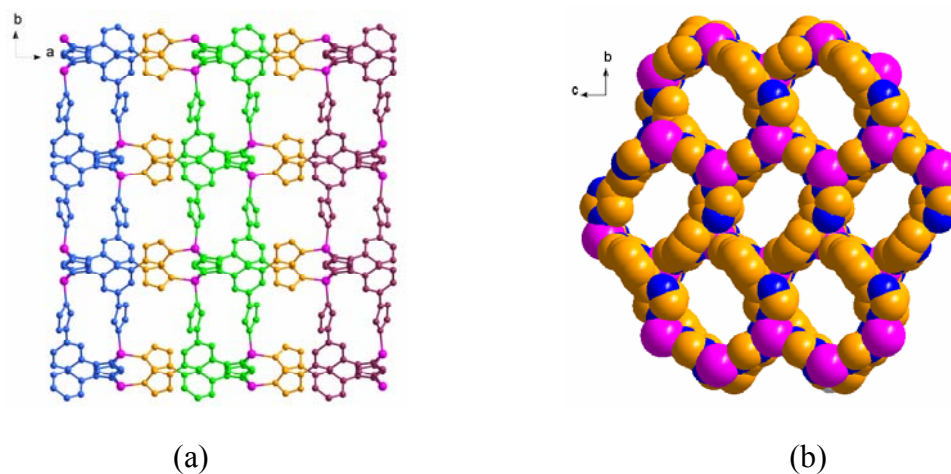

**Figure S2.** (a) 3D structure of **1** constructed from the 2D networks (in color) pillared by the third imidazole group (yellow). (b) The space filling view of the 1D channels along *a* axis in **1**.

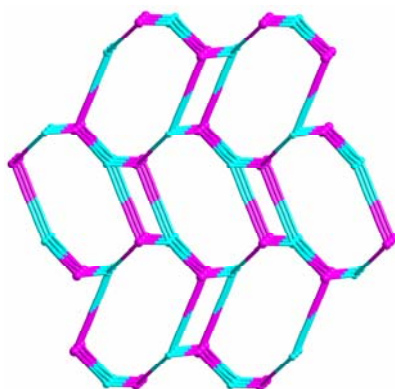

**Figure S3.** Schematic representation of the zeolite **BCT** topology of **1**, pink balls represent the Co(II) atoms and turquoise balls represent the centers of benzene ring plane of  $(HL)^{2-}$ .

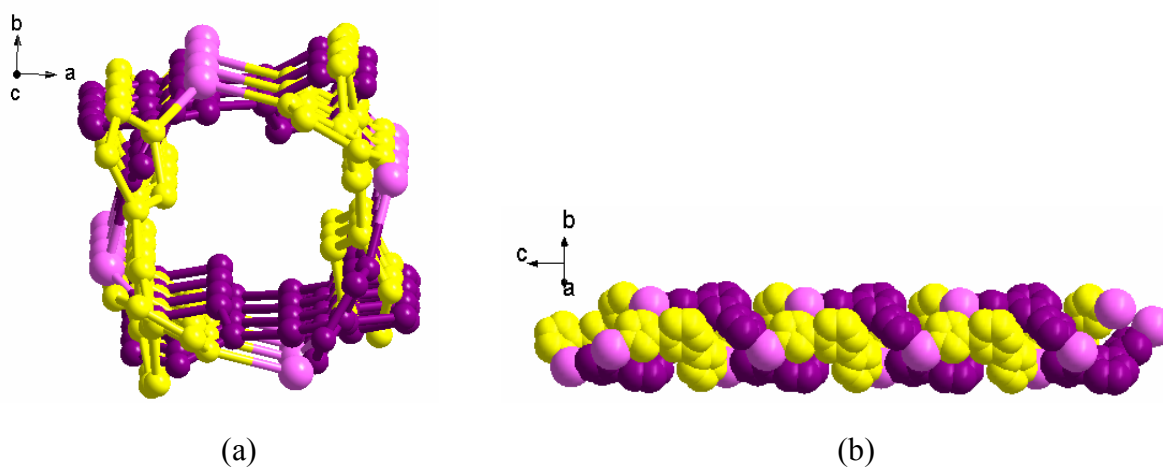

**Figure S4.** (a) The helical tubes in **2** represented by central phenyl rings and imidazole groups together with Co(II) atoms. (b) The  $4_1$  helices in **2**.

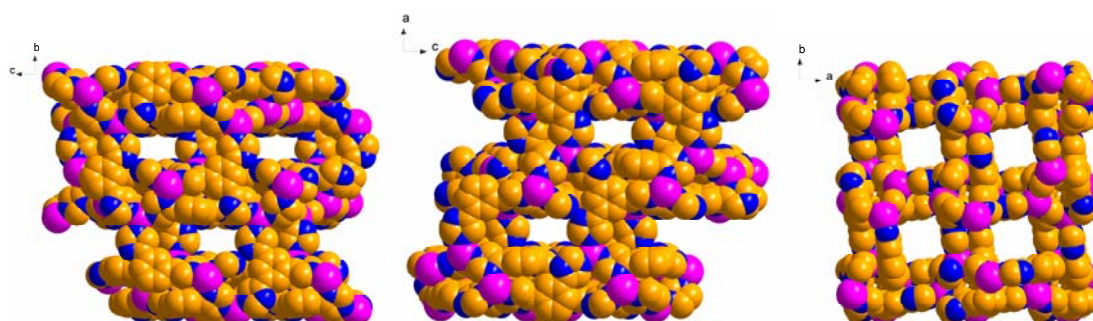

**Figure S5.** The space filling views of 3D channels of **2** along  $a$ ,  $b$ ,  $c$  axes respectively.

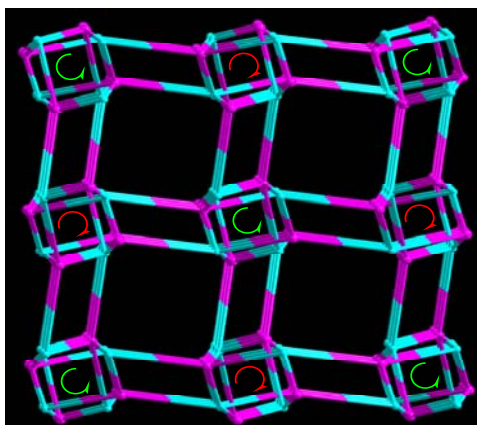

**Figure S6.** Schematic representation of the *ecl/I* topology of **2**, pink balls represent the Co(II) atoms and turquoise balls represent the centers of benzene ring plane of (HL)<sup>2-</sup>.

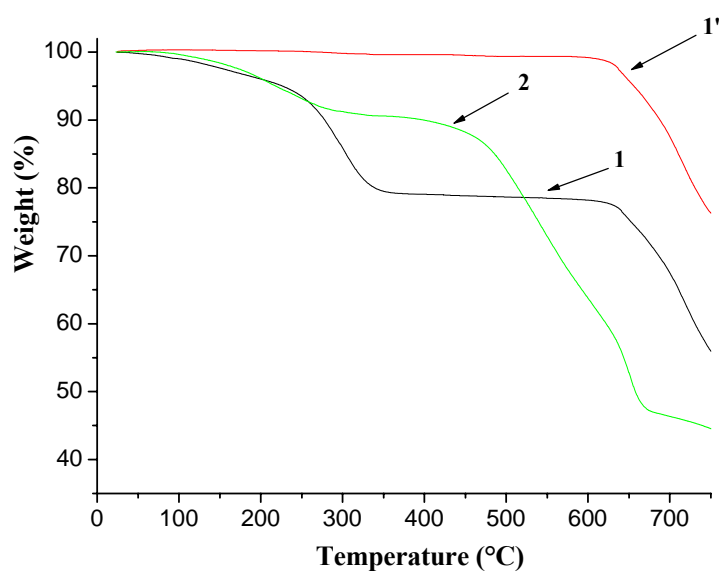

**Figure S7.** The TGA curves of **1**, **1'** and **2**.
